# Supplementary material
Source: PubMed Central journal article supplement (PMC9017171)
Supplement: mmc1.pdf [file mmc1.pdf]

**Cell Reports Methods, Volume 1**

**Supplemental information**

**CUT&Tag-BS for simultaneous profiling  
of histone modification and DNA methylation  
with high efficiency and low cost**

**Ruifang Li, Sara A. Grimm, and Paul A. Wade**

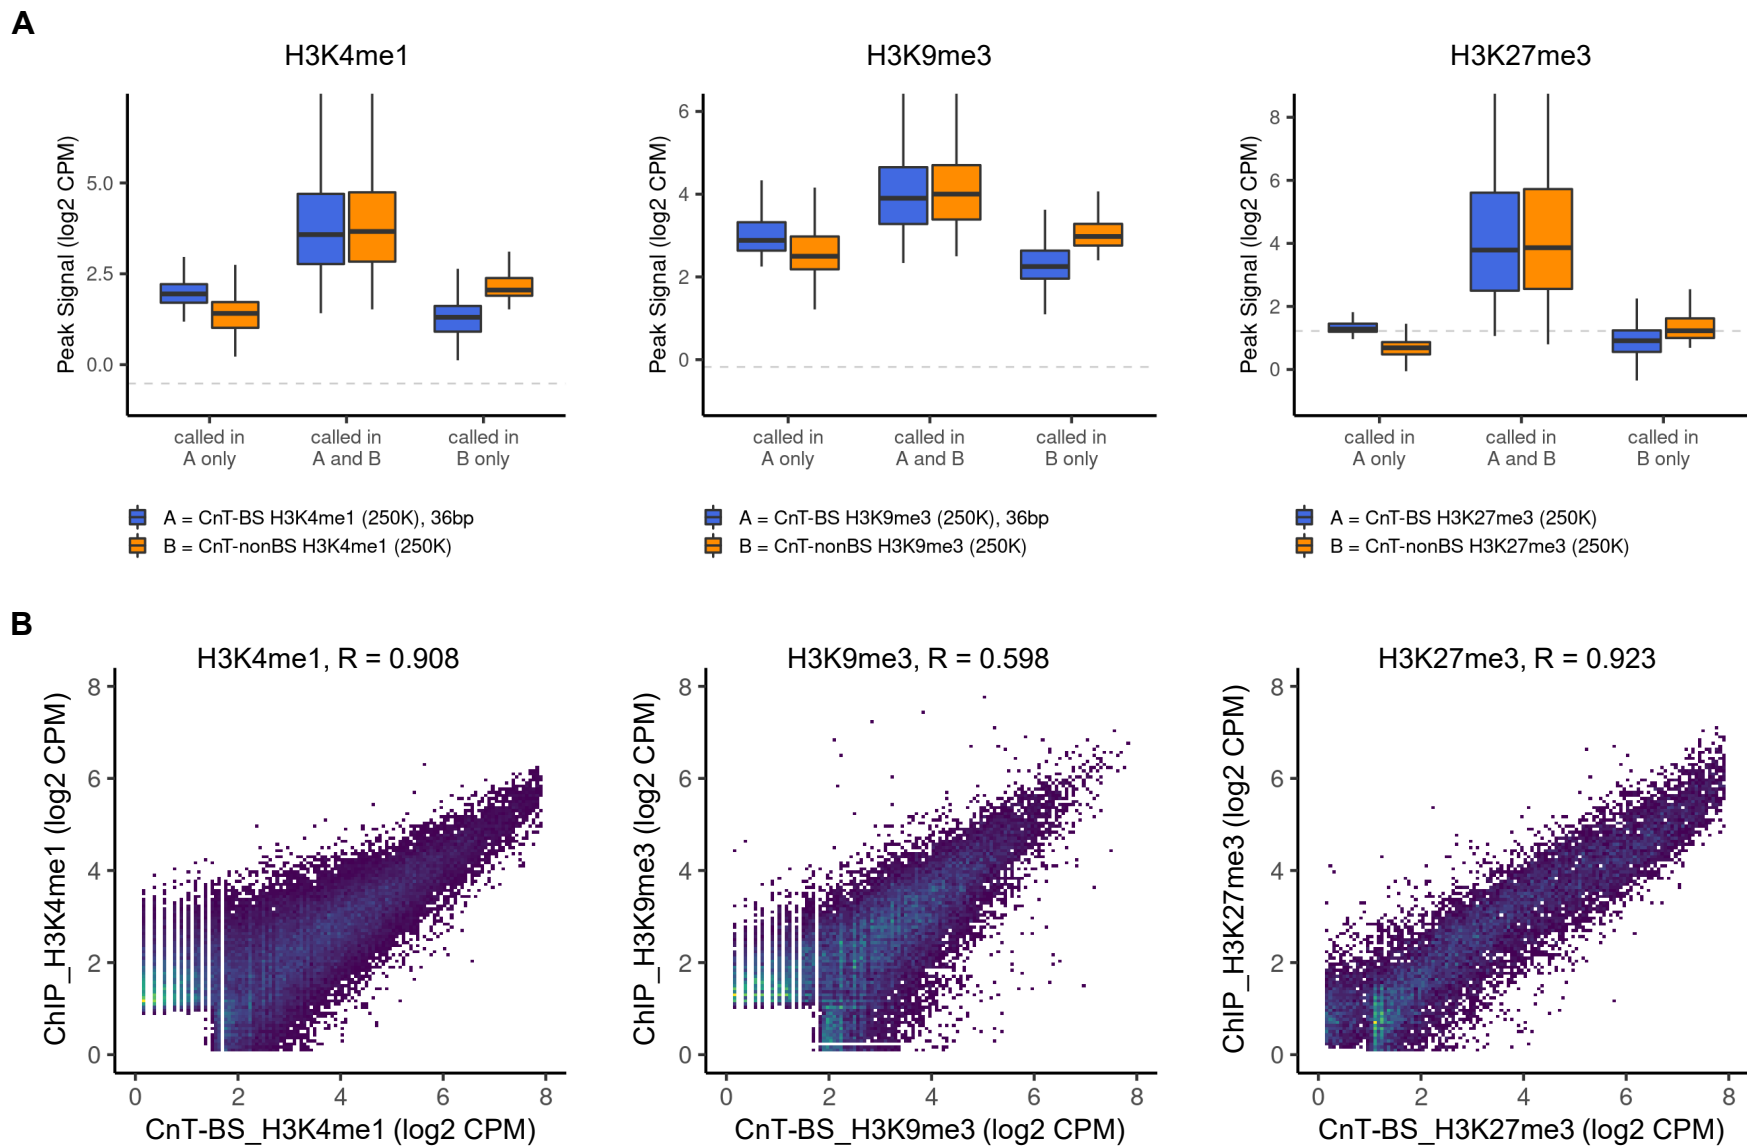

**Figure S1.** Evaluating the consistency of histone modification enrichments between CUT&Tag-BS and conventional methods, CUT&Tag\_nonBS and ChIP-seq, Related to Figure 3. (A) Non-overlapped peaks show much lower enrichment signals than common peaks in the comparison of CUT&Tag-BS with CUT&Tag\_nonBS. The gray dashed line represents random background. (B) Density-scatter plots displaying correlation of peak signals between CUT&Tag-BS and ChIP-seq. Each dot represents an individual peak with viridis color scale indicating density. Pearson's  $r$  value was shown at the top of each plot.

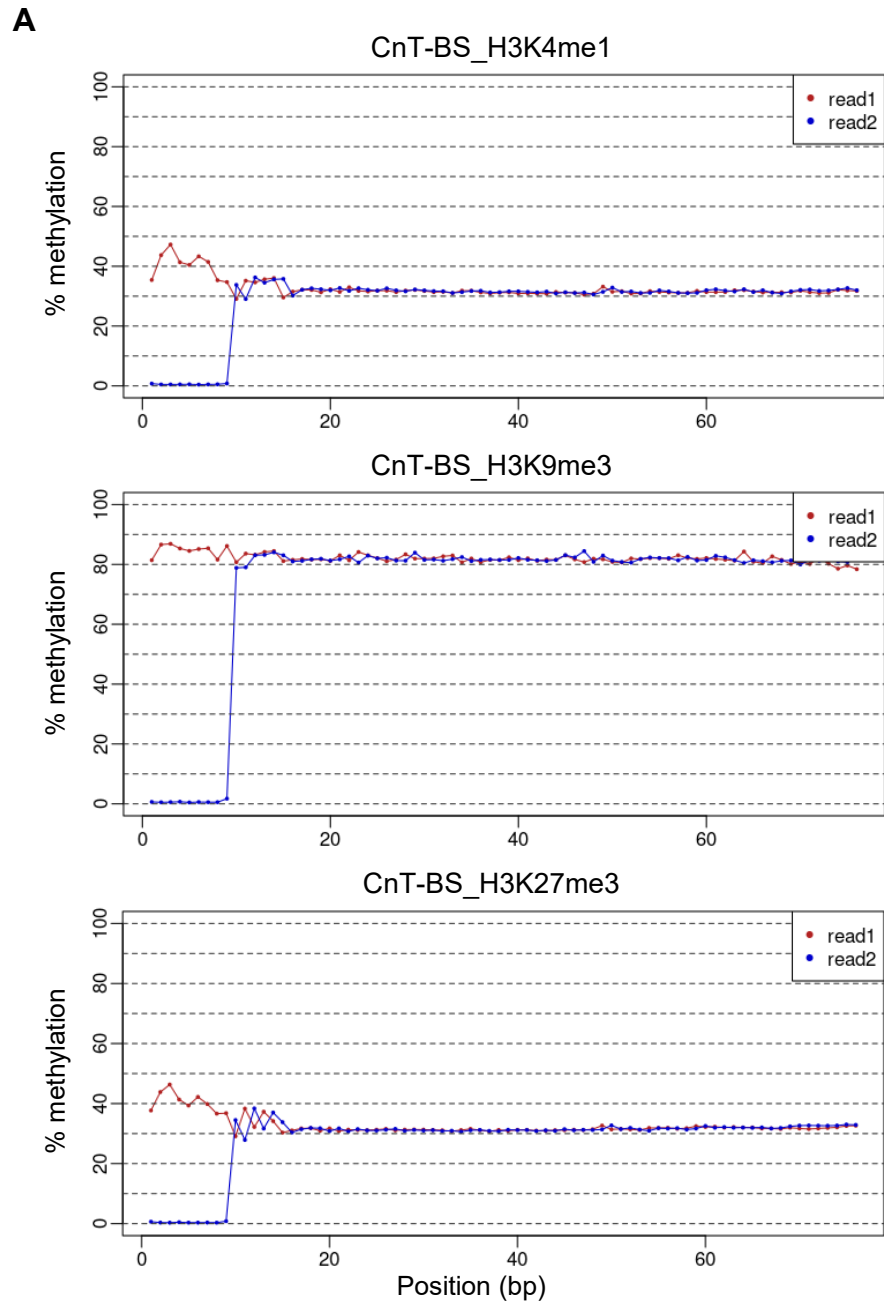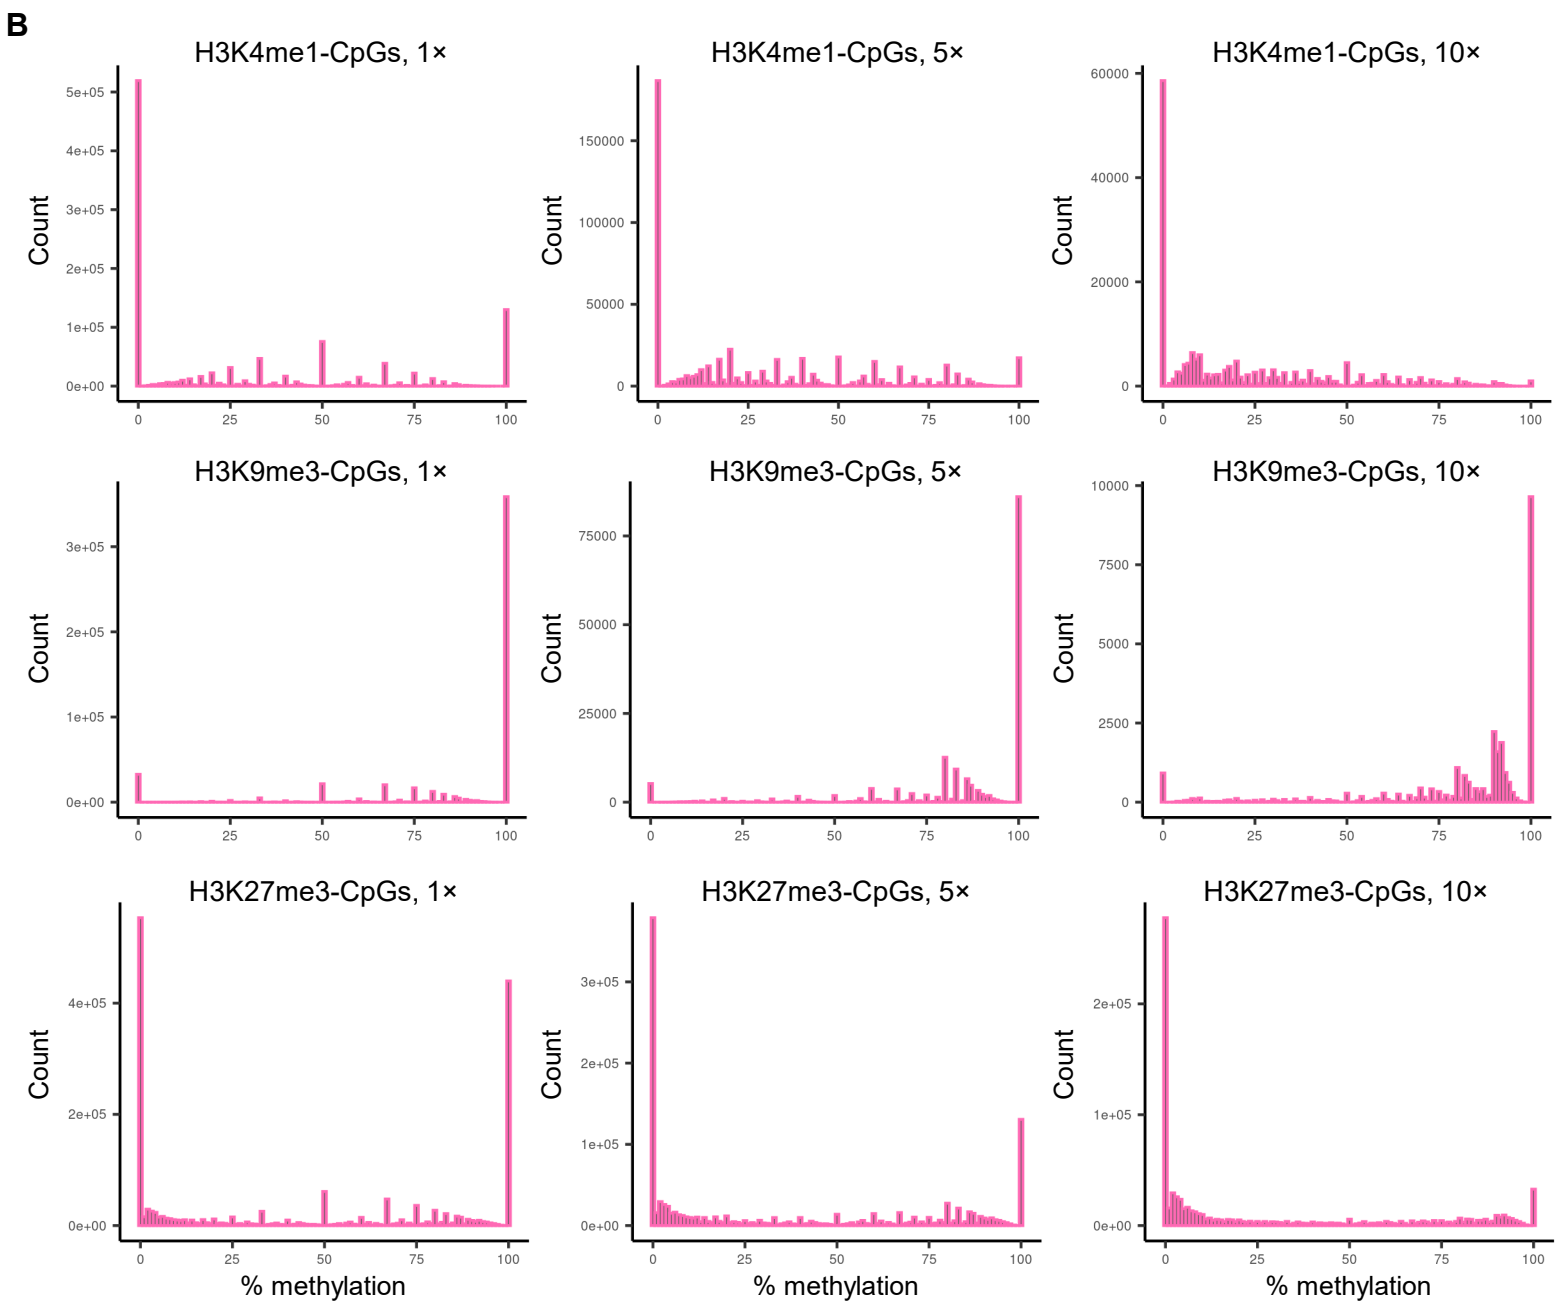

**Figure S2.** CUT&Tag-BS simultaneously measures DNA methylation, Related to Figure 4. (A) M-bias plots showing averaged CpG methylation rates per position along the reads. (B) Histograms displaying the distribution of methylation levels of individual CpGs at H3K4me1-, H3K9me3-, or H3K27me3-peaks with minimum coverage of 1×, 5×, or 10×.

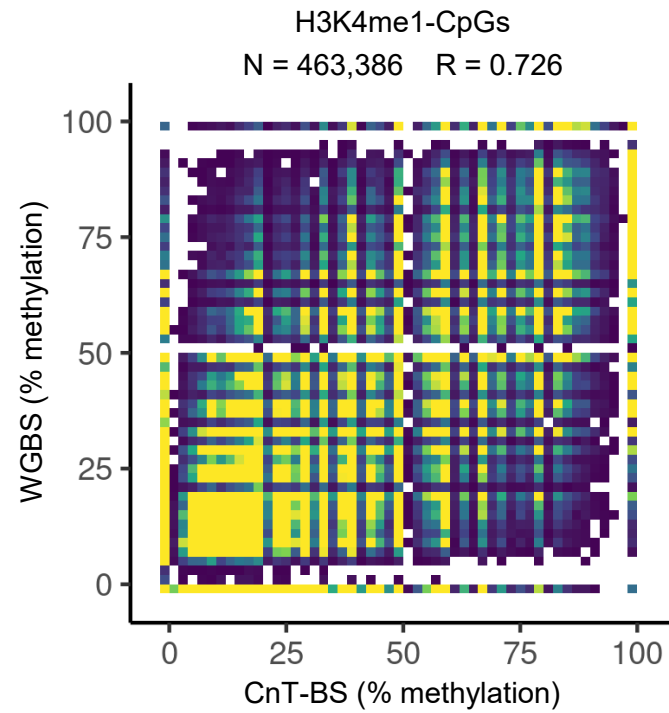

**Figure S3.** Density scatter plot displaying correlation of methylation at H3K4me1-CpGs between CUT&Tag-BS and WGBS, Related to Figure 4. Only CpGs at H3K4me1-peaks with minimum coverage of 5 $\times$  in both datasets were included. Each dot represents an individual CpG with viridis color scale indicating density. Pearson's  $r$  value was shown at the top of the plot.

| H3K4me1-CpGs (1,225,519) |                    |                  |                  |
|--------------------------|--------------------|------------------|------------------|
| Sample                   | minimum CpG depth  |                  |                  |
|                          | 1×                 | 5×               | 10×              |
| CnT-BS_run1 (PE36)       | 945,053<br>77.1%   | 227,952<br>18.6% | 52,984<br>4.3%   |
| CnT-BS_run2 (PE76)       | 1,129,111<br>92.1% | 526,411<br>43.0% | 182,927<br>14.9% |

  

| H3K9me3-CpGs (591,273) |                   |                  |                |
|------------------------|-------------------|------------------|----------------|
| sample                 | minimum CpG depth |                  |                |
|                        | 1×                | 5×               | 10×            |
| CnT-BS_run1 (PE36)     | 317,347<br>53.7%  | 18,541<br>3.1%   | 1,487<br>0.3%  |
| CnT-BS_run2 (PE76)     | 522,923<br>88.4%  | 165,672<br>28.0% | 28,568<br>4.8% |

**Figure S4.** Coverage of CpGs at H3K4me1- or H3K9me3-peaks when using different sequencing read length (PE36 vs. PE76), Related to Figure 5. The number and percentage of CpGs at H3K4me1- or H3K9me3-peaks with minimum coverage of 1×, 5×, or 10× were shown.

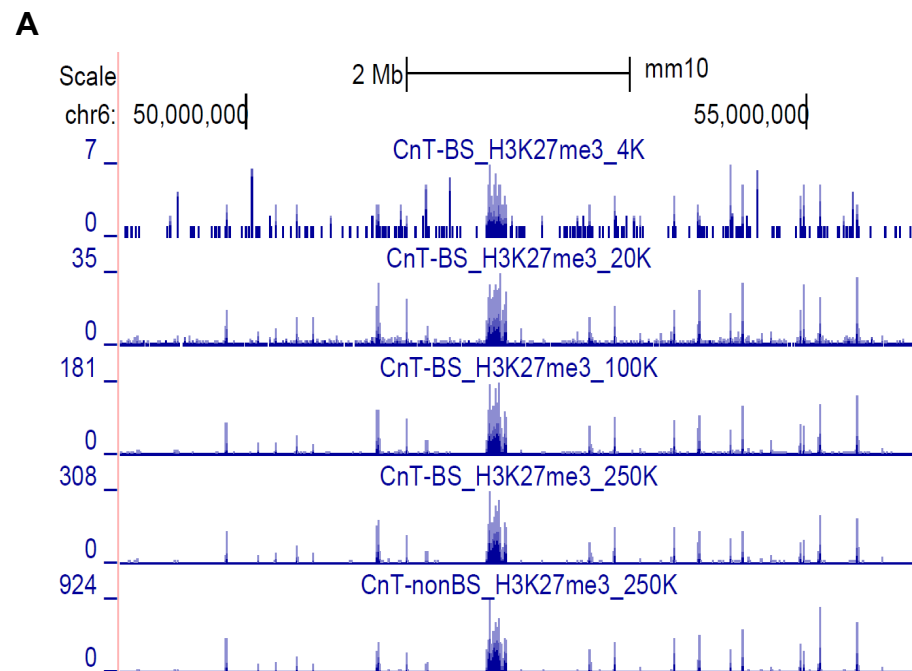

**B**

H3K27me3-CpGs (1,843,093)

| Sample               | minimum CpG depth  |                    |                  |
|----------------------|--------------------|--------------------|------------------|
|                      | 1×                 | 5×                 | 10×              |
| CnT-BS_H3K27me3_4K   | 222,370<br>12.1%   | 1,726<br>0.1%      | 20<br>0.0%       |
| CnT-BS_H3K27me3_20K  | 1,137,938<br>61.7% | 293,835<br>15.9%   | 71,560<br>3.9%   |
| CnT-BS_H3K27me3_100K | 1,681,526<br>91.2% | 970,830<br>52.7%   | 624,006<br>33.9% |
| CnT-BS_H3K27me3_250K | 1,747,774<br>94.8% | 1,155,472<br>62.7% | 784,908<br>42.6% |

**Figure S5.** Robustness and input requirement of CUT&Tag-BS, Related to Figure 7. (A) UCSC genome browser view of H3K27me3 coverage tracks at chr6:48,879,717-55,974,833 generated with different numbers of input cells in CUT&Tag-BS. (B) The number and percentage of CpGs at H3K27me3-peaks with 1×, 5×, or 10× minimum coverage in each sample.

**Table S1. List of oligonucleotides used in this study, related to STAR Methods.**

| <b>Oligo/Primer name</b>     | <b>Sequence (5' to 3')</b>                             | <b>Modifications</b>                                               |
|------------------------------|--------------------------------------------------------|--------------------------------------------------------------------|
| Tn5mC-Apt1                   | TcGTcGGcAGcGTcAGATGTGTATAAGAGAcAG                      | c: 5C-methylated                                                   |
| Tn5mC1.1-A1block             | pCTGTCTCTTATAcAddC                                     | p: phosphate, ddC: dideoxycytidylate                               |
| Tn5mC-RepI01                 | pcTGTcTcTTATAcAcATcTccGAGccCAcGAGAcinvT                | p: phosphate, c: 5C-methylated,<br>invT: inverted deoxythymidylate |
| i5 universal PCR primer      | AATGATACGGCGACCACCGAGATCTACACTCGTCGGCAGCGTCAGATGTG     |                                                                    |
| i7 barcode PCR primer_Ad2.25 | CAAGCAGAAGACGGCATAcGAGATCACTTTGTGTCTCGTGGGCTCGGAGATGTG |                                                                    |
| i7 barcode PCR primer_Ad2.26 | CAAGCAGAAGACGGCATAcGAGATTTCAAGTAGTCTCGTGGGCTCGGAGATGTG |                                                                    |
| i7 barcode PCR primer_Ad2.27 | CAAGCAGAAGACGGCATAcGAGATGCTATCACGTCTCGTGGGCTCGGAGATGTG |                                                                    |
| i7 barcode PCR primer_Ad2.28 | CAAGCAGAAGACGGCATAcGAGATAATCTACTGTCTCGTGGGCTCGGAGATGTG |                                                                    |
| i7 barcode PCR primer_Ad2.1  | CAAGCAGAAGACGGCATAcGAGATTCGCCTTAGTCTCGTGGGCTCGGAGATGTG |                                                                    |
| i7 barcode PCR primer_Ad2.2  | CAAGCAGAAGACGGCATAcGAGATCTAGTACGGTCTCGTGGGCTCGGAGATGTG |                                                                    |
| i7 barcode PCR primer_Ad2.3  | CAAGCAGAAGACGGCATAcGAGATTTCTGCCTGTCTCGTGGGCTCGGAGATGTG |                                                                    |
| i7 barcode PCR primer_Ad2.4  | CAAGCAGAAGACGGCATAcGAGATGCTCAGGAGTCTCGTGGGCTCGGAGATGTG |                                                                    |
| i7 barcode PCR primer_Ad2.6  | CAAGCAGAAGACGGCATAcGAGATCATGCCTAGTCTCGTGGGCTCGGAGATGTG |                                                                    |
